# Supplementary material for: Controlling the 3D architecture of Self-Lifting Auto-generated Tissue Equivalents (SLATEs) for optimized corneal graft composition and stability
Source: PubMed Central journal article supplement (PMC5267636; doi:10.1016/j.biomaterials.2016.12.023), 2017-03
Supplement: mmc1.pdf [file mmc1.pdf]

1 **Figure S1**

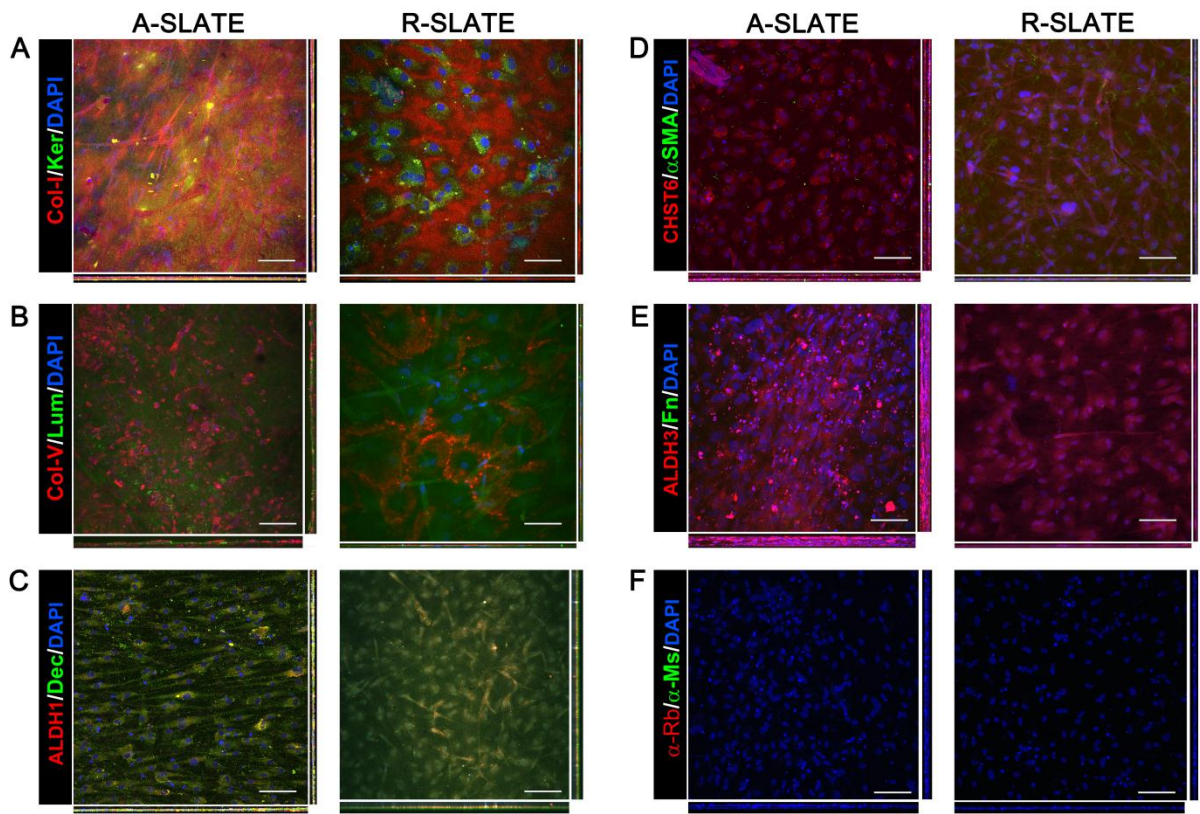

2

3

1 **Figure S2**

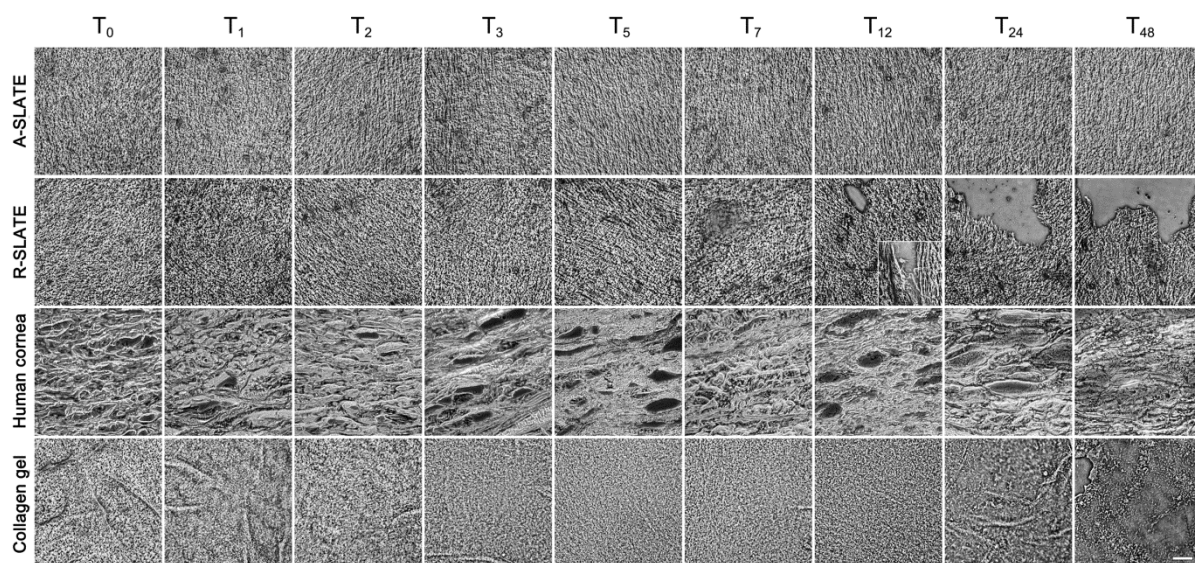

2

3

1 **Figure S3**

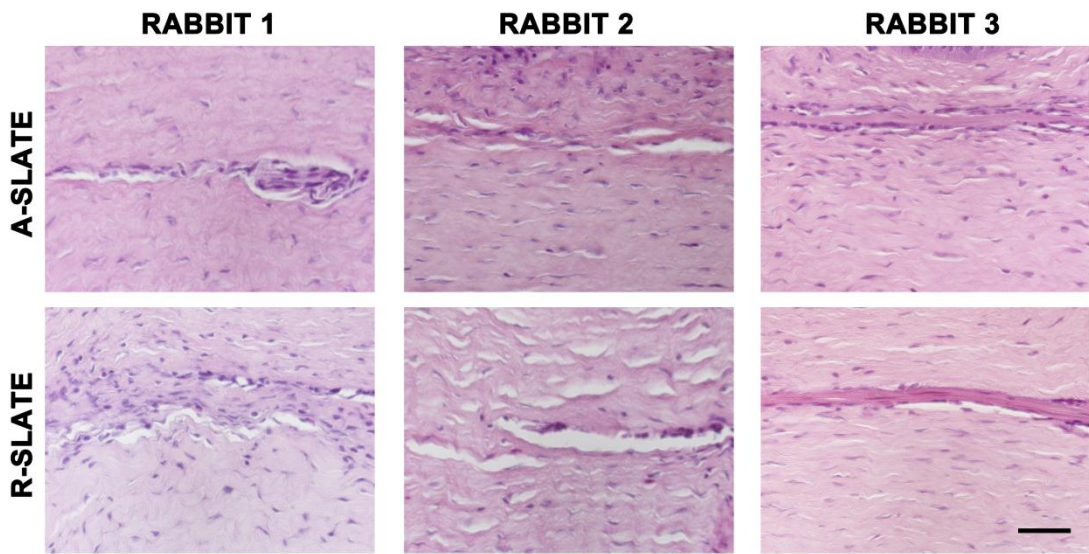

2

3
